# Supplementary material for: Stabilizing intermediate phases via the efficient confinement effects of the SnS2-SPAN fibre composite for ultra-stable half/full sodium/potassium-ion batteries
Source: Royal Society of Chemistry journal article supplement (doi:10.1039/d2ta02517e), 2022-01-01
Supplement: d2ta02517e1.pdf [file d2ta02517e1.pdf]

## Supporting Information

### Stabilizing intermediate phases via efficient confinement effects of SnS<sub>2</sub>-SPAN fibre composite for ultra-stable half/full sodium/potassium-ion batteries

Yiyi Wang<sup>a</sup>, Xi Chen<sup>a</sup>, Xiaochuan Chen<sup>b\*</sup>, Chuyuan Lin<sup>a</sup>, Hong-En Wang<sup>c\*</sup>, Peixun Xiong<sup>e</sup>, Qinghua Chen<sup>a, d</sup>, Qingrong Qian<sup>a, d</sup>, Mingdeng Wei<sup>e</sup> and Lingxing Zeng<sup>a, d\*</sup>

<sup>a</sup> Engineering Research Centre of Polymer Green Recycling of Ministry of Education, Fujian Key Laboratory of Pollution Control & Resource Reuse, College of Environmental Science and Engineering, Fujian Normal University, Fuzhou, Fujian 350007, China.

<sup>b</sup> Key Laboratory for Polymeric Composite and Functional Materials of Ministry of Education, School of Chemistry, Sun Yat-Sen University, Guangzhou, Guangdong, China.

<sup>c</sup> College of Physics and Electronics Information, Yunnan Key Laboratory of Optoelectronic Information Technology, Yunnan Normal University, Kunming, 650500, China.

<sup>d</sup> Key Laboratory of Advanced Energy Materials Chemistry (Ministry of Education), College of Chemistry, Nankai University, Tianjin 300071, China.

<sup>e</sup> Fujian Provincial Key Laboratory of Electrochemical Energy Storage Materials, Fuzhou University, Fuzhou, Fujian 350002, China.

### Experimental

#### Materials characterization

X-ray diffraction (XRD) test was performed on a Bruker D8 diffractometer to analysis the crystalline structures of samples. The morphologies of samples were investigated by scanning electron microscopy (SEM) and transmission electron microscopy (TEM), using a Hitachi 8100 and FEI F20 S-TWIN equipment, respectively. Raman spectra and FTIR spectroscopy were recorded on a DXR2xi (a diode laser of excitation of 532 nm) and Thermo Scientific Nicolet iS10, respectively. Thermogravimetric analysis (TGA, temperature rises from 30 to 800 °C in 5 °C min<sup>-1</sup>, air) and Electron paramagnetic resonance (EPR) measurement were carried out on a TA-SDT Q600 analyzer and a MS 5000, respectively. X-ray photoelectron spectroscopy (XPS) spectra were applied to study the surface chemical valence states of samples, conducted on an ESCALAB MARK II spherical analyzer.

#### Electrochemical measurements

The cycle performance of Na/K-ion storage of all the electrodes were investigated by CR2025-type coin cells, which applies pure sodium/potassium metal sheet as the counter/reference electrodes, the glass fiber film (Whatman GF/D) as separator. Active materials, conductive agent (super P) and carboxymethyl cellulose binder (CMC) with a weight ratio of 8:1:1 to fabricate a slurry, then painted on a copper foil followed by dried at 80 °C in a vacuum overnight to obtain the working electrodes. In which, the mass loading of the active materials on each copper foil was approximately 1-1.5 mg cm<sup>-2</sup>. The specific capacities of electrodes are calculated based on the total mass of the whole composite. For instance, the capacity of SnS<sub>2</sub>-SPAN electrode is calculated based on the total mass of SnS<sub>2</sub> and SPAN. The electrolytes were 1 M NaPF<sub>6</sub> in EC/DMC/EMC=1:1:1 with 5% FEC and 7 M KFSI in 100% DME, respectively, for SIBs and PIBs. Additionally, Na-ion full cell was assembled with Na<sub>3</sub>V<sub>2</sub>(PO<sub>4</sub>)<sub>3</sub> as cathode and SnS<sub>2</sub>-SPAN-470-1 as anode, where the SnS<sub>2</sub>-SPAN-470-1 anode was presodiated for several cycles until the CE reached up to 95% before assembling full cells. The capacity ratio of the SnS<sub>2</sub>-SPAN-470-1 anode and NVP cathode was optimized to 1: 1.2 in the sodium full-cells. The battery was fabricated in a glove box in an argon atmosphere. The Na/K storage performances and cyclic voltammetry (CV) were tested on a LAND CT 2001A battery tester system with a voltage range of 0.01-3 V and an Ivium-n-Stat electrochemical workstation, respectively.

#### Computational details

Spin-polarized first-principles density functional theory (DFT) calculations were carried out using projector augmented wave (PAW) pseudopotentials with an exchange-correlation functional of Perdew-Burke-Ernzerhof (PBE) formation implemented in VASP.<sup>S1, S2</sup> An energy cutoff of 400 eV was used for geometry optimization calculations. The simulation box has a size of 20Å×20.1Å×19.9Å for the calculations of adsorption of various species on SPAN or PAN surface. For adsorption calculations on N-doped graphene, a surface slab with a size of 12.8Å×14.8Å×15Å containing 60 C and 9 N atoms were

\* Corresponding authors. Tel. & Fax: +86-591 8346 5156.

E-mail addresses: [zenglingxing@fjnu.edu.cn](mailto:zenglingxing@fjnu.edu.cn) (L. Zeng), [hongen.wang@outlook.com](mailto:hongen.wang@outlook.com) (H.-E. Wang), [chenxch29@mail2.sysu.edu.cn](mailto:chenxch29@mail2.sysu.edu.cn) (X. Chen).

adopted. The  $k$ -point sampling was acquired using a  $\Gamma$ -centered Monkhorst-Pack scheme with a  $1 \times 1 \times 1$  mesh and  $2 \times 2 \times 1$  mesh for box containing SPAN (or PAN) and N-doped graphene surface slab, respectively. The convergence criteria for SCF iteration and force were set to  $1.0 \times 10^{-5}$  eV/atom and  $0.05$  eV/Å, respectively.

The adsorption energies ( $E_{\text{ads}}$ ) were determined using the following equation:

$$E_{\text{ads}} = E_{\text{mol/sub}} - (E_{\text{mol}} + E_{\text{sub}})$$

Where  $E_{\text{mol/sub}}$ ,  $E_{\text{mol}}$  and  $E_{\text{sub}}$  denote the total electronic energies of surface with adsorbed species, and Sn, Na<sub>2</sub>S, SnS<sub>2</sub> molecule in gas phase, as well as clean surface, respectively. During the surface calculations, dipole correction was adopted along  $z$ -axis and van der Waals interactions were considered using DFT-D method. The drawing of the calculated data was performed using VESTA.<sup>53</sup> Some pre- and post-treatment processes were carried out with the assistance of VASPKIT.<sup>54</sup>

## Supplementary Figures and Tables

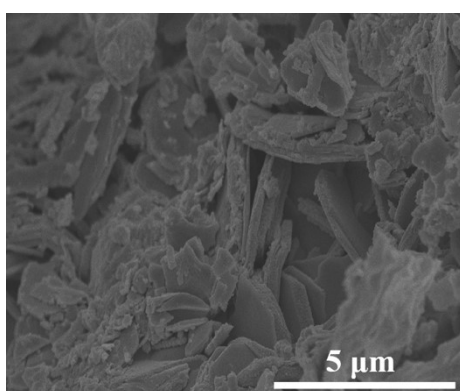

Fig. S1 SEM images of pure SnS<sub>2</sub>.

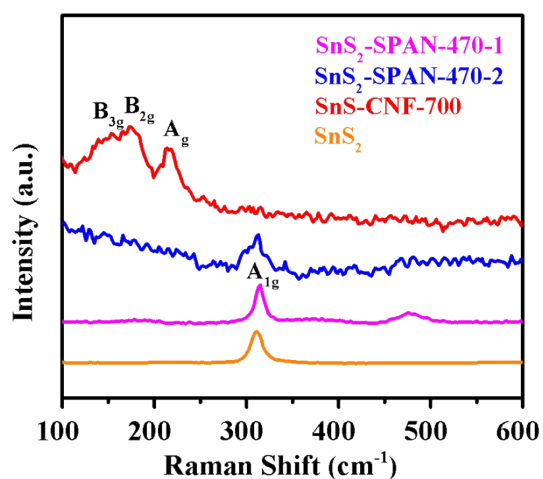

Fig. S2 Raman spectra of the SnS<sub>2</sub>-SPAN-470-1, SnS<sub>2</sub>-SPAN-470-2, SnS-CNF-700 and pure SnS<sub>2</sub>.

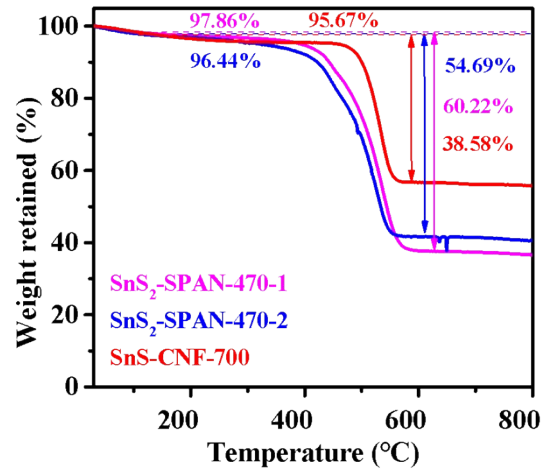

Fig. S3 TG curves of the SnS<sub>2</sub>-SPAN-470-1, SnS<sub>2</sub>-SPAN-470-2 and SnS-CNF-700 obtained in an air flow at a heating rate of 10 °C min<sup>-1</sup>.

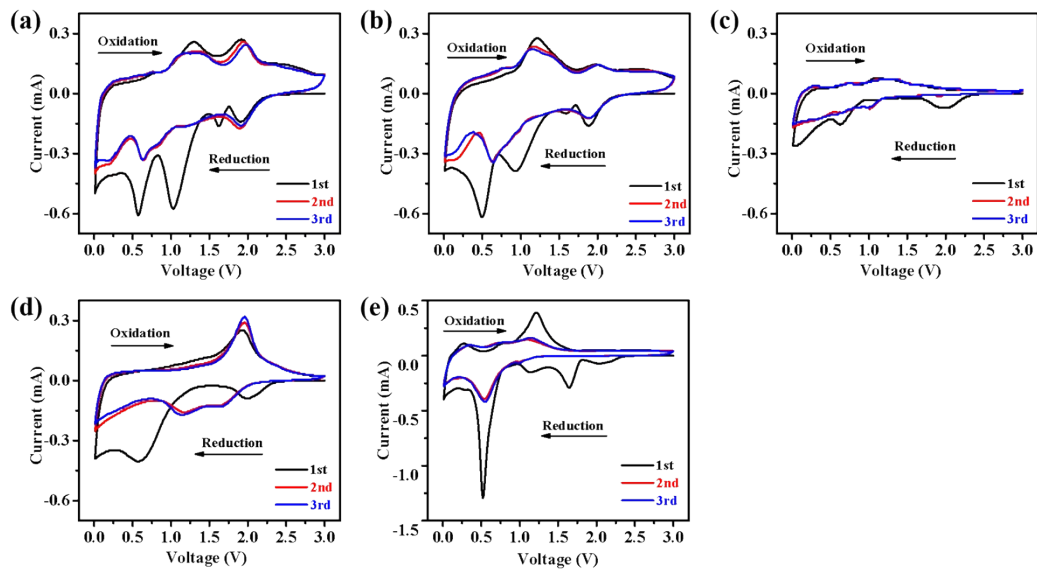

Fig. S4 Cyclic voltammetry curves of (a) SnS<sub>2</sub>-SPAN-470-1, (b) SnS<sub>2</sub>-SPAN-470-2, (c) SnS-CNF-700, (d) SPAN-470 and (e) pure SnS<sub>2</sub> electrodes at a scan rate of 0.2 mV s<sup>-1</sup>.

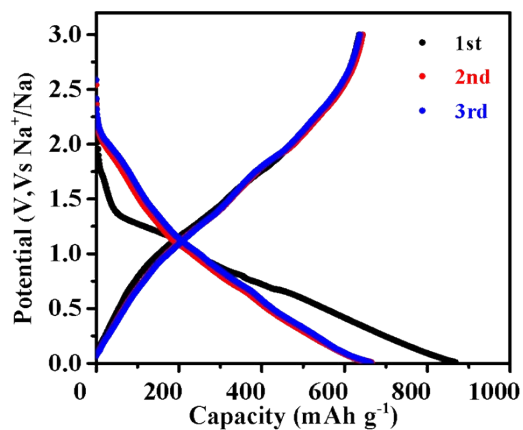

Fig. S5 The charge-discharge profiles of the SnS<sub>2</sub>-SPAN-470-1 electrode at 100 mA g<sup>-1</sup> within a voltage range of 0.01-3.0 V for SIBs.

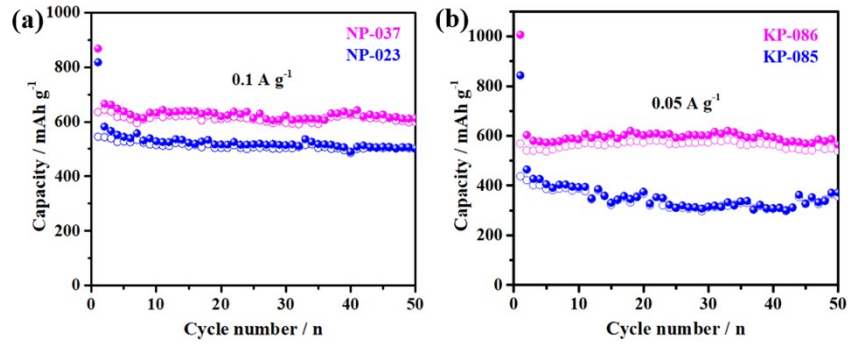

Fig. S6 Cycling performances of  $\text{SnS}_2$ -SPAN-470-1 electrode in (a) SIBs and (b) PIBs with different electrolytes.

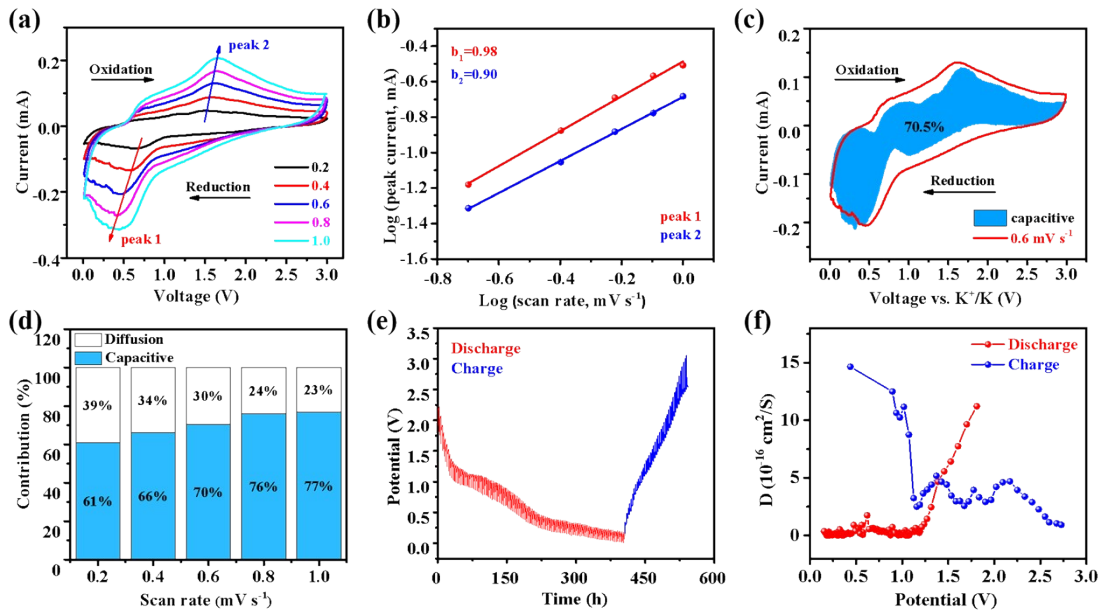

Fig. S7 Electrochemical performances of  $\text{SnS}_2$ -SPAN-470-1 electrode in PIBs: (a) Cyclic voltammograms at various scan rates of 0.2, 0.4, 0.6, 0.8 and 1.0  $\text{mV s}^{-1}$ . (b)  $b$  value determination. (c) Contribution of Capacitive (blue area) at 0.6  $\text{mV s}^{-1}$ . (d) Capacitive capacities (blue) and the diffusion controlled (white) at different scan rates. (e) GITT curve. (f)  $\text{K}^+$  diffusion coefficients at different voltages.

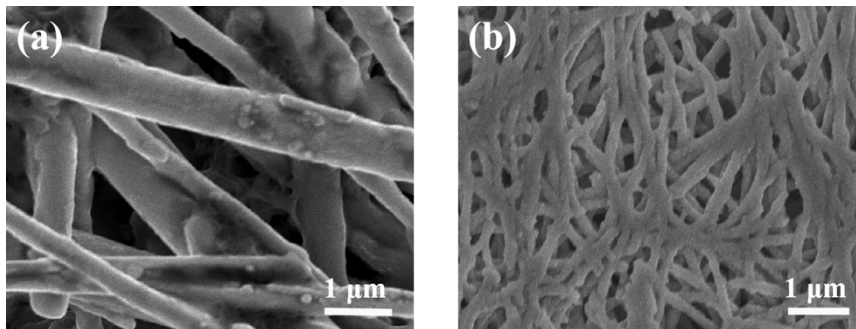

Fig. S8 SEM images of the  $\text{SnS}_2$ -SPAN-470-1 electrode after 150 cycles at 0.1  $\text{A g}^{-1}$  (a) when discharged to 0.02 V for SIBs, (b) when charged to 3.0 V for PIBs.

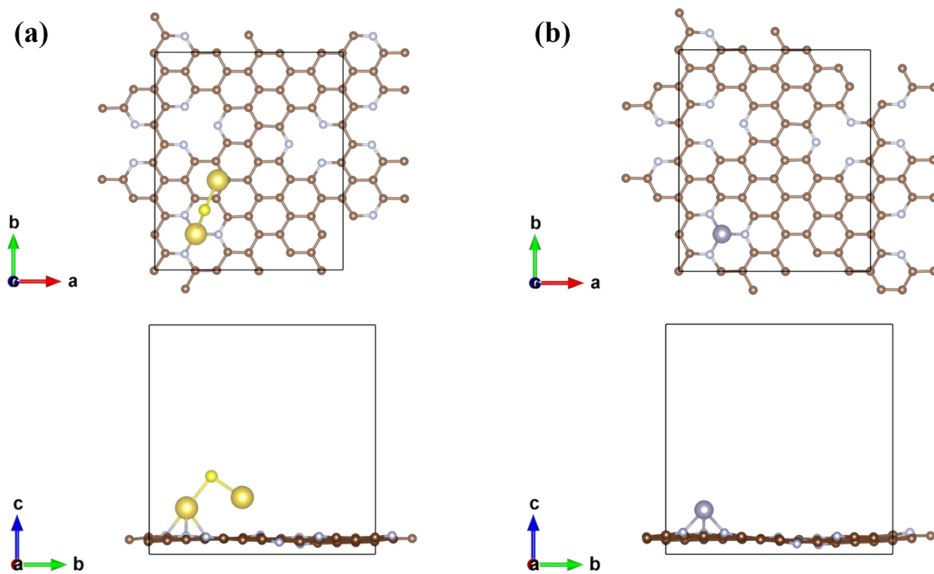

Fig. S9 Adsorption of (a)  $\text{Na}_2\text{S}$  molecule and (b) one Sn atom on N-doped graphene after geometry optimization.

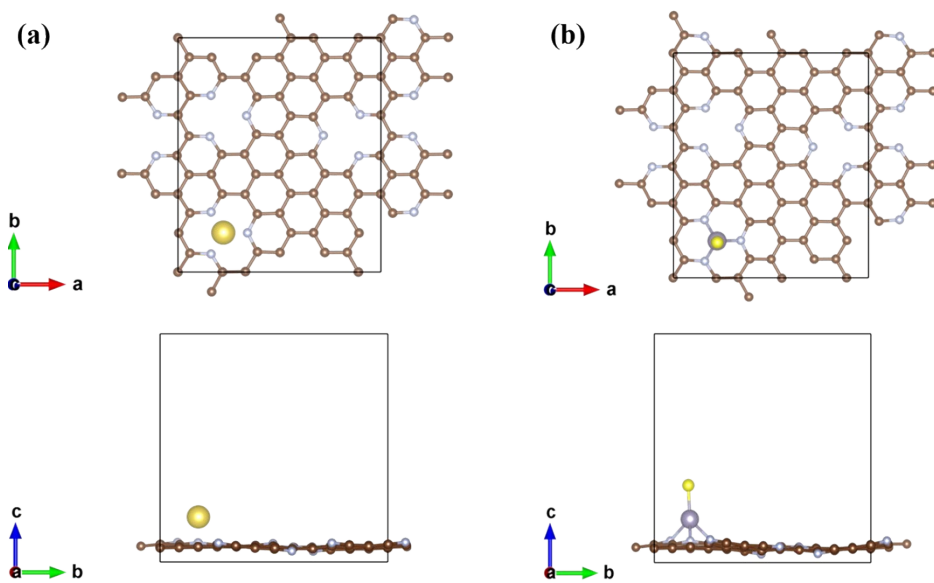

Fig. S10 Adsorption of (a) one Na atom (b)  $\text{SnS}_2$  molecule on N-doped graphene after geometry optimization.

**Table S1** Electrochemical performance of the SnS<sub>2</sub>-SPAN-470-1 and newly reported other anode materials for SIBs/PIBs.

| Sample                                   | Fields | Cycling performance                  |                       |                                            | Rate performance                     |                                           | References |
|------------------------------------------|--------|--------------------------------------|-----------------------|--------------------------------------------|--------------------------------------|-------------------------------------------|------------|
|                                          |        | Current density (A g <sup>-1</sup> ) | Cycles                | Reversible capacity (mAh g <sup>-1</sup> ) | Current density (A g <sup>-1</sup> ) | Capacity retention (mAh g <sup>-1</sup> ) |            |
| SnS <sub>2</sub> -SPAN-470-1             | SIBs   | 0.1<br>5<br>10                       | 100<br>10000<br>30000 | 613<br>328<br>261                          | 30                                   | 148                                       | This work  |
|                                          | PIBs   | 0.05<br>5                            | 50<br>2000            | 565<br>221                                 |                                      |                                           |            |
| PASP@SnS <sub>2</sub> @CN                | PIBs   | 0.1<br>0.5                           | 100<br>500            | 372<br>269                                 | 2                                    | 273                                       | [32]       |
| GNS@SnS <sub>2</sub> /SnS@C              | SIBs   | 0.1                                  | 100                   | 476                                        | 5                                    | 289                                       | [33]       |
| SnS <sub>2</sub> @C-1V 1 SMF             | PIBs   | 0.1                                  | 100                   | 412                                        | 2                                    | 138                                       | [41]       |
| N, S-C/SnS <sub>2</sub>                  | PIBs   | 0.1<br>2                             | 50<br>200             | 503<br>106                                 | 2                                    | 105                                       | [40]       |
| SnS <sub>2</sub> NSs/MXene               | PIBs   | 0.05<br>0.5                          | 100<br>800            | 342<br>206                                 | 1                                    | 163                                       | [42]       |
| hs-SnS <sub>2</sub>                      | SIBs   | 0.2<br>0.5<br>1                      | 60<br>100<br>1000     | 577<br>548<br>486                          | 4                                    | 390                                       | [31]       |
| SnS <sub>2</sub> @rGO                    | PIBs   | 0.05<br>1                            | 100<br>300            | 387<br>205                                 | 0.05<br>1                            | 442<br>247                                | [37]       |
| SnS <sub>2</sub> @C-2                    | PIBs   | 0.1<br>2                             | 200<br>1000           | 343<br>183                                 | 5                                    | 219                                       | [68]       |
| rGO-CoS <sub>2</sub> -GNCs               | SIBs   | 0.1<br>0.5<br>1                      | 150<br>600<br>400     | 524<br>466<br>412                          | 2                                    | 423                                       | [47]       |
| FeS/SPAN-HNF                             | SIBs   | 5                                    | 500                   | 328                                        | 20                                   | 126                                       | [45]       |
| NSC                                      | SIBs   | 0.1<br>1                             | 100<br>2000           | 316<br>214                                 | 3                                    | 178                                       | [55]       |
| TiO <sub>2</sub> @TiOF <sub>2</sub> -30h | SIBs   | 0.5<br>5                             | 200<br>10000          | 152<br>101                                 | 5                                    | 115                                       | [65]       |
| MS-FeSb                                  | SIBs   | 0.5                                  | 80                    | 420                                        | 1                                    | 300                                       | [66]       |
| MnP <sub>4</sub> /G20                    | SIBs   | 0.05<br>0.5                          | 100<br>250            | 627<br>446                                 | 2                                    | 385                                       | [67]       |

## References

- [S1] J. Perdew, K. Burke, M. Ernzerhof, Phys. Rev. Lett., 1996, **77**, 3865-3868.  
[S2] G. Kresse, D. Joubert, Phys. Rev. B, 1999, **59**, 1758-1775.  
[S3] K. Momma, F. Izumi, J. Appl. Cryst., 2011, **44**, 1272-1276.  
[S4] V. Wang, N. Xu, J.-C. Liu, G. Tang, W.-T. Geng, Comp. Phys. Comm., 2021, **267**, 108033.  
[S5] J. Li, Z. Ding, L. Pan, J. Li, C. Wang, G. Wang, Carbon, 2021, **173**, 31-40.
